# Supplementary material
Source: Springer Nature journal article supplement (https://www.springermedizin.de/resource/supplementary/12939_2011_247_MOESM6_ESM.pdf/9550690)

Cum % of testing for AIDS

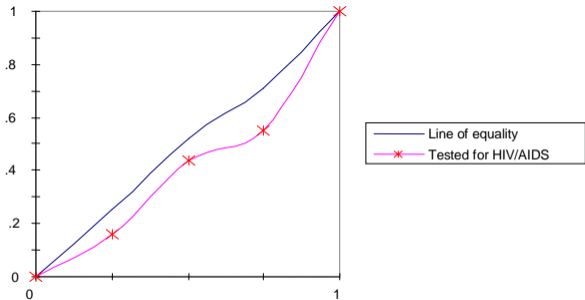

Cum % of women ranked by household wealth

Supplement: MOESM6 [file 9550690]
